# Supplementary material for: Assessment of PVS Enhancement Methods Using a Three-Dimensional Computational Model
Source: Preprints.org preprint supplement (doi:10.20944/preprints202204.0058.v1), 2022-04-07
Supplement: Supplementary file 1 [file supplementary]

# Assessment of PVS enhancement methods using a three-dimensional computational model: supplementary material

## 3 Results

For illustration purposes, we show precision-recall curves yielded by the Frangi, Jerman, and RORPO filters for 4-mm length and 2-mm width PVS in different conditions. We selected a PVS with such dimensions as it was found an average size in the study of reference (Ballerini et al., 2020).

### 3.2.1 Slice thickness

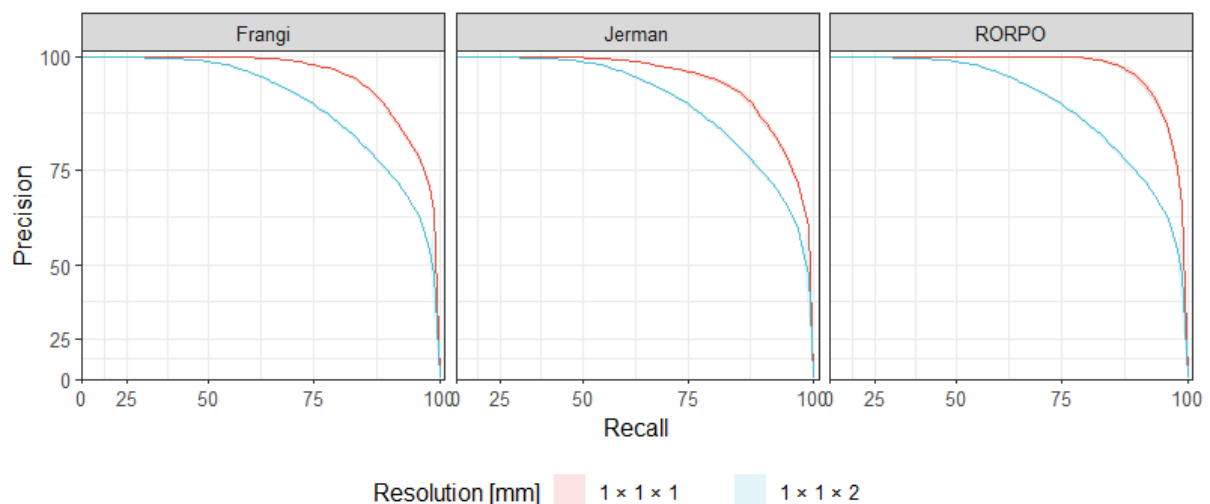

Figure S1. Precision-recall curve obtained by the Frangi, Jerman, and RORPO filters on a 4-mm length and 2-mm width PVS after sampling. Lines and shadowed areas represent mean precision-recall curves and their confidence interval, respectively.

### 3.2.2 Motion artefacts

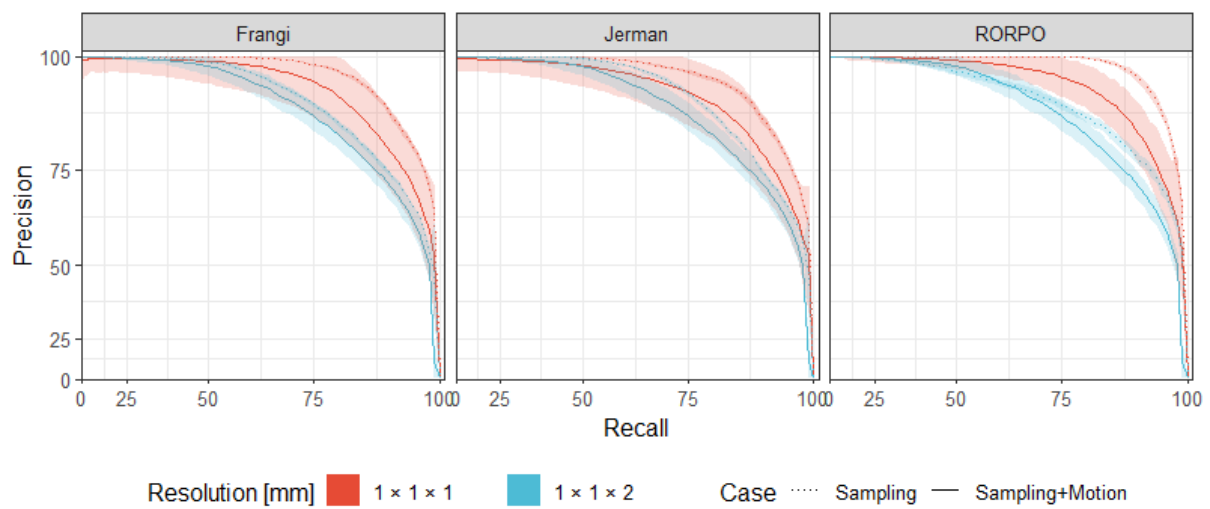

Figure S2. Precision-recall curve obtained by the Frangi, Jerman, and RORPO filters on a 4-mm length and 2-mm width PVS after sampling and incorporating motion artefacts. Lines and shadowed areas represent mean precision-recall curves and their confidence interval, respectively.

### 3.2.3 Rician noise

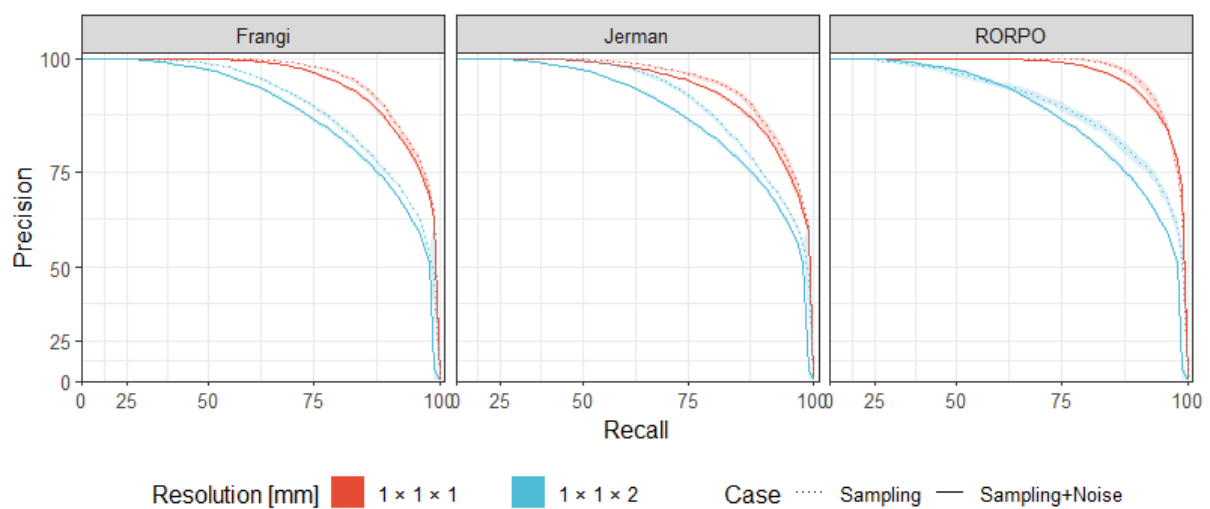

Figure S3. Precision-recall curve obtained by the Frangi, Jerman, and RORPO filters on a 4-mm length and 2-mm width PVS after sampling and adding Rician noise. Lines and shadowed areas represent mean precision-recall curves and their confidence interval, respectively.

### 3.3 Effect of pathological regions

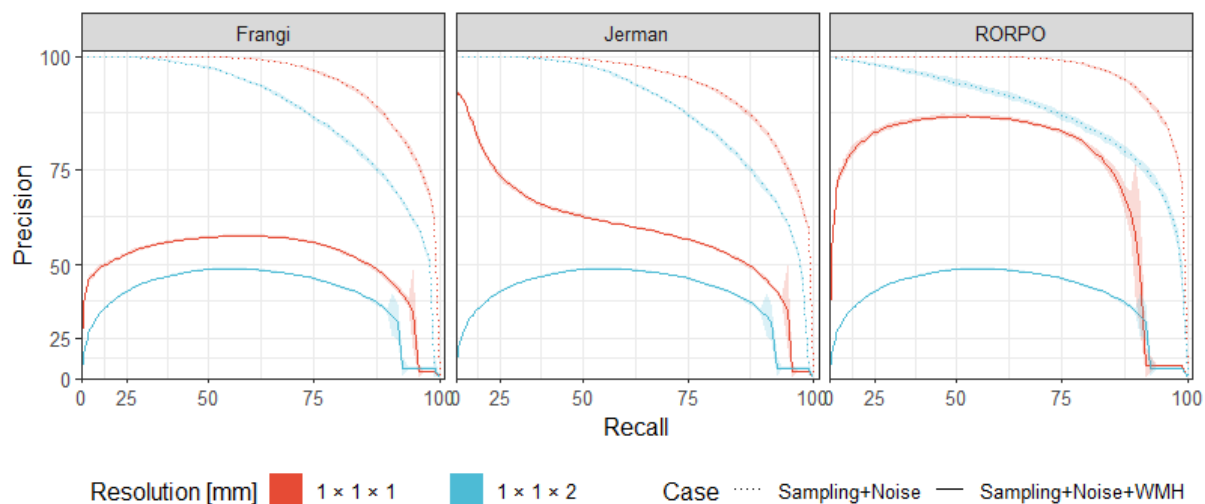

Figure S4. Precision-recall curve obtained by the Frangi, Jerman, and RORPO filters on a 4-mm length and 2-mm width PVS after sampling, noise, and WMH. Lines and shadowed areas represent mean precision-recall curves and their confidence interval, respectively.

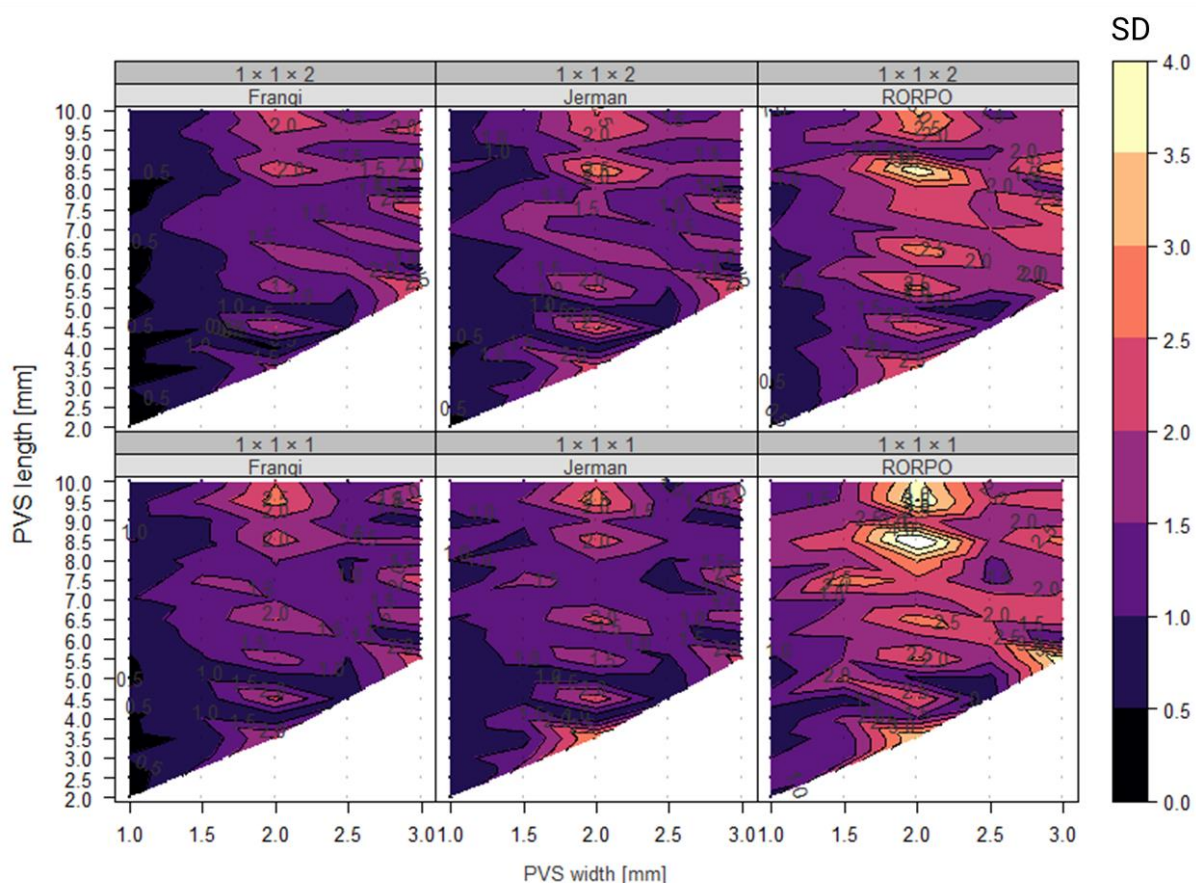

Figure S5. Effect of WMH in addition to sampling and Rician noise on the standard deviation of the area under precision-recall curve. We consider two scanning resolutions,  $1 \times 1 \times 1$  (bottom row) and  $1 \times 1 \times 2$  (top row) mm, to explore the impact of isotropic and anisotropic voxels on segmentation performance.

*White regions represent cases that were not considered (width  $\geq$  length, eccentricity  $< 0.8$ , or lack of PVS visibility). Imaging considerations: k-space sampling.*

## References

Ballerini, L., Booth, T., Valdés Hernández, M. del C., Wiseman, S., Lovreglio, R., Muñoz Maniega, S., ... Wardlaw, J. (2020). Computational quantification of brain perivascular space morphologies: Associations with vascular risk factors and white matter hyperintensities. A study in the Lothian Birth Cohort 1936. *NeuroImage: Clinical*, 25(November 2019), 102120. <https://doi.org/10.1016/j.nicl.2019.102120>
